# Supplementary material for: Expression and Prognostic Significance of the Nicotinic Receptor Cluster on 15q25 about CHRNA5 and PSMA4 mRNA in Lung Adenocarcinoma Utilizing TCGA Datasets
Source: Research Square preprint supplement (doi:10.21203/rs.3.rs-26978/v3), 2020-11-10
Supplement: Supplementary file 1 [file 870616430d57b60d3d4e021a.docx]

**Supplement Figure 1**

**
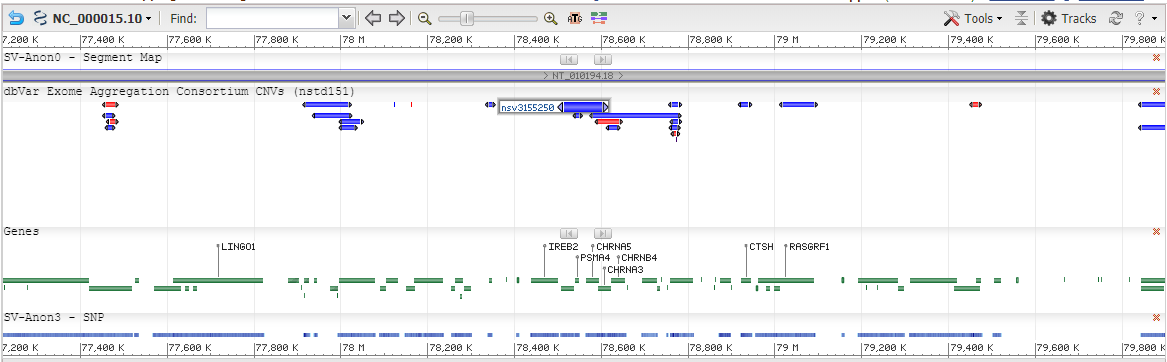
**

**Supplement Figure 2 Kaplan–Meier analysis of the correlation between IREB2, CHRNA3, CHRNB4, HYKK expression level and overall survival (OS) / recurrence free survival (RFS) based on the TCGA database.**

**
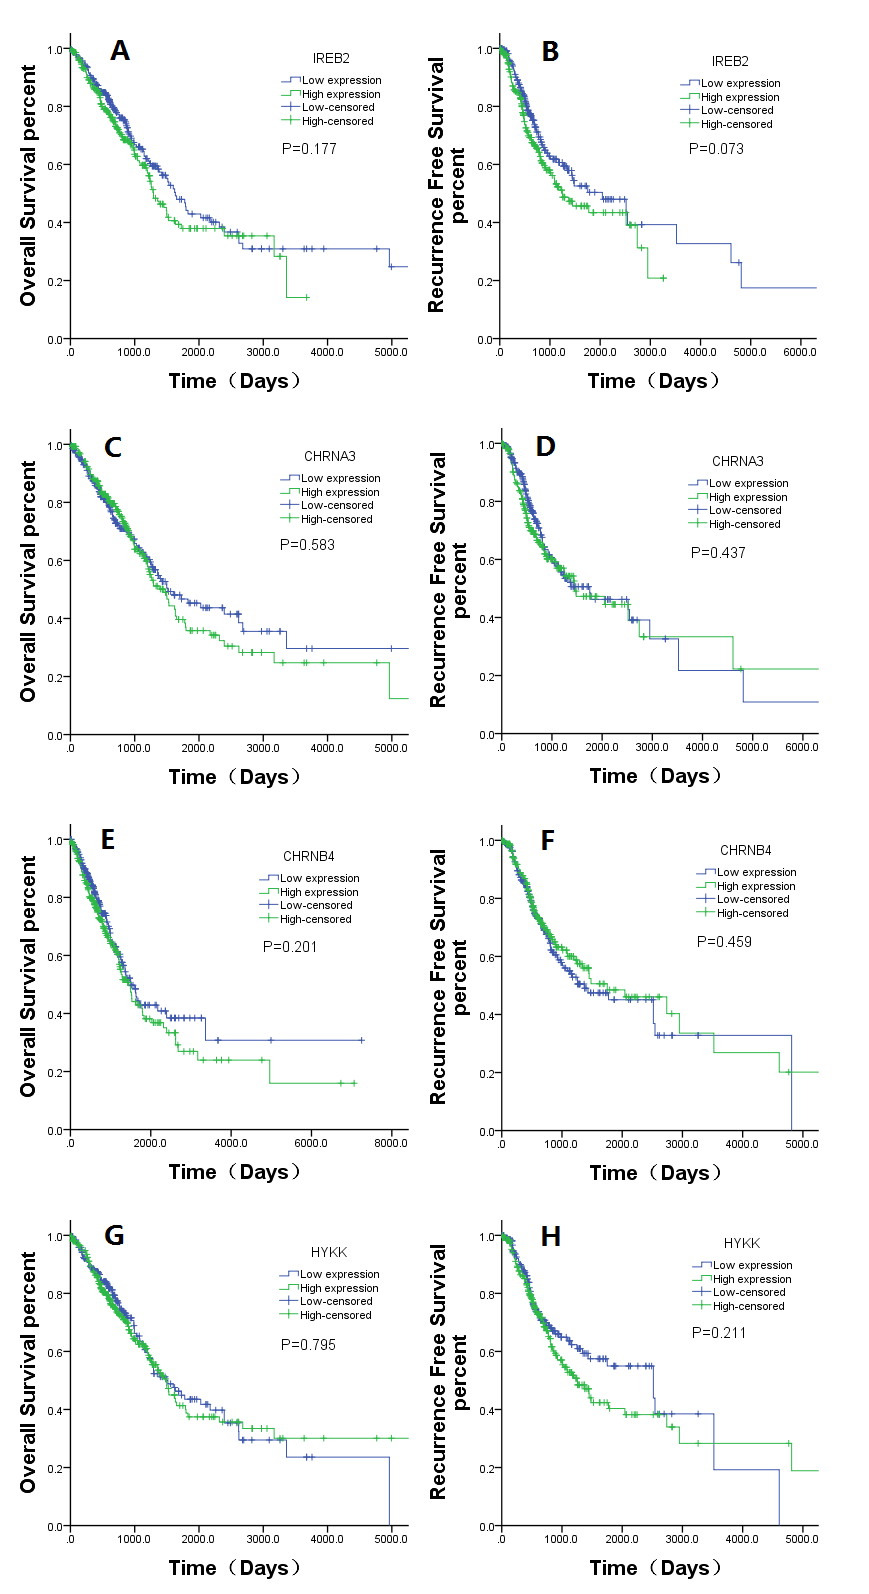
**
